# Supplementary material for: Incidence of Second Primary Malignancies in Patients with Castration-Resistant Prostate Cancer: An Observational Retrospective Cohort Study in the United States
Source: Hindawi journal article supplement (doi:10.1155/2019/4387415), 2019-02-11
Supplement: f1 [file 4387415.f1.pdf]

## SUPPLEMENTARY MATERIAL

**Table S-1 Study Patients and Follow-up Years, by Cohort Entry Year (N = 2,234)**

| Cohort Entry Year      | Patients n (%) | Follow-up, Years n (%) | Follow-up, Years per Patient |                                            |
|------------------------|----------------|------------------------|------------------------------|--------------------------------------------|
|                        |                |                        | Mean (SD)                    | Five-Number Summary (Min-Q1-Median-Q3-Max) |
| 2000/2001 <sup>†</sup> | 51 (2.3)       | 89 (3.0)               | 1.74 (3.09)                  | 0.03 - 0.26 - 0.72 - 1.58 - 13.45          |
| 2002                   | 67 (3.0)       | 120 (4.1)              | 1.78 (2.94)                  | 0.00 - 0.35 - 0.72 - 1.71 - 11.98          |
| 2003                   | 84 (3.8)       | 114 (3.9)              | 1.36 (1.81)                  | 0.01 - 0.41 - 0.90 - 1.58 - 10.90          |
| 2004                   | 118 (5.3)      | 198 (6.8)              | 1.68 (1.99)                  | 0.07 - 0.46 - 1.01 - 1.87 - 9.35           |
| 2005                   | 179 (8.0)      | 319 (10.9)             | 1.78 (2.19)                  | 0.03 - 0.53 - 0.97 - 2.02 - 8.91           |
| 2006                   | 173 (7.7)      | 257 (8.8)              | 1.49 (1.53)                  | 0.00 - 0.46 - 1.06 - 1.72 - 7.99           |
| 2007                   | 188 (8.4)      | 309 (10.6)             | 1.65 (1.62)                  | 0.03 - 0.52 - 1.00 - 2.19 - 6.80           |
| 2008                   | 164 (7.3)      | 232 (7.9)              | 1.41 (1.35)                  | 0.00 - 0.52 - 1.05 - 1.84 - 5.99           |
| 2009                   | 192 (8.6)      | 281 (9.6)              | 1.47 (1.24)                  | 0.02 - 0.55 - 0.95 - 2.19 - 4.82           |
| 2010                   | 192 (8.6)      | 239 (8.2)              | 1.24 (0.98)                  | 0.01 - 0.50 - 1.00 - 1.56 - 3.94           |
| 2011                   | 256 (11.5)     | 335 (11.5)             | 1.31 (0.86)                  | 0.02 - 0.53 - 1.21 - 2.07 - 2.98           |
| 2012                   | 292 (13.1)     | 295 (10.1)             | 1.01 (0.53)                  | 0.02 - 0.53 - 1.12 - 1.43 - 1.99           |
| 2013                   | 278 (12.4)     | 134 (4.6)              | 0.48 (0.29)                  | 0.00 - 0.22 - 0.46 - 0.74 - 0.99           |

Abbreviations: max, maximum; min, minimum; SD, standard deviation; Q1, first quartile; Q3, third quartile.

<sup>†</sup>Data for the years 2000 and 2001 were combined to prevent the reporting of cell counts less than 11, which is prohibited by the Surveillance, Epidemiology, and End Results (SEER)-Medicare data use agreement.

**Table S-2 Types of Second Primary Malignancies Found Using Surveillance, Epidemiology, and End Results (SEER)-Medicare Data**

| Cancer Type                                              | n   | %    |
|----------------------------------------------------------|-----|------|
| Lung/bronchus                                            | 29  | 16.9 |
| Urinary bladder                                          | 22  | 12.8 |
| Colon/rectum                                             | 21  | 12.2 |
| Nonprostate, nonbladder genitourinary tract <sup>†</sup> | 18  | 10.5 |
| Noncolorectal gastrointestinal <sup>‡</sup>              | 17  | 9.9  |
| Non-Hodgkin lymphoma and myeloma                         | 15  | 8.7  |
| Brain                                                    | 14  | 8.1  |
| Miscellaneous or unspecified                             | 13  | 7.6  |
| Meninges, head, neck, and endocrine                      | 12  | 7.0  |
| Melanoma, breast, and nipple                             | 11  | 6.4  |
| Total                                                    | 172 | 100  |

<sup>†</sup>Nonprostate, nonbladder genitourinary tract = cancers of the kidney, ureters, urethra, and testis.

<sup>‡</sup>Noncolorectal gastrointestinal = cancers of the esophagus, stomach, small intestine, liver, biliary tract, and pancreas.
